# Supplementary material
Source: PubMed Central journal article supplement (PMC2625421)
Supplement: 13224_1.pdf [file 13224_1.pdf]

## Characterization of 35 new cases with four different MPLW515 mutations and essential thrombocytosis or primary myelofibrosis

Susanne Schmittger,<sup>1</sup> Ulrike Bacher,<sup>2</sup> Claudia Haferlach,<sup>1</sup> Dietrich Beelen,<sup>3</sup> Peter Bojko,<sup>4</sup> Dieter Bürkle,<sup>5</sup> Robert Dengler,<sup>6</sup> Andrea Distelrath,<sup>7</sup> Michael Eckart,<sup>8</sup> Robert Eckert,<sup>9</sup> Stefan Fries,<sup>10</sup> Jan Knoblich,<sup>11</sup> Georg Köchling,<sup>12</sup> Hans-Peter Laubenstein,<sup>13</sup> Petro Petrides,<sup>14</sup> Manfred Planker,<sup>15</sup> Rudolf Pihusch,<sup>16</sup> Rudolf Weide,<sup>17</sup> Wolfgang Kern,<sup>1</sup> and Torsten Haferlach<sup>1</sup>

<sup>1</sup>MLL Munich Leukemia Laboratory, Munich; <sup>2</sup>Clinic for Stem Cell Transplantation, University Hospital of Hamburg,

Hamburg-Eppendorf; <sup>3</sup>University Hospital of Essen, Department of Bone Marrow Transplantation, Essen; <sup>4</sup>Munich Oncology Practice, MVZ Elisenhof, Munich; <sup>5</sup>Hematology & Oncology Practice, Plüderhausen; <sup>6</sup>Hematology & Oncology Group Practice, Regensburg; <sup>7</sup>Medical Treatment Centre Osthessen Ltd., Hematology & Oncology Practice, Fulda; <sup>8</sup>Hematology & Oncology Practice, Erlangen; <sup>9</sup>Hematology Practice, Wendlingen; <sup>10</sup>Medical Treatment Centre am Bruderwald, Hematology & Oncology Practice, Bamberg; <sup>11</sup>Hematology & Oncology Practice, Lörrach; <sup>12</sup>Hematology & Oncology Practice, Villingen-Schwenningen; <sup>13</sup>Hematology & Oncology Practice, Trier; <sup>14</sup>Internist, Hematology & Oncology Practice, München; <sup>15</sup>Hospital of Krefeld, Medical Clinic II, Krefeld; <sup>16</sup>Hematology & Oncology Practice, Rosenheim, Germany; <sup>17</sup>Hematology & Oncology Practice, Koblenz, Germany

## Supplementary appendix

**Online Supplementary Table S1a.** Distribution of high level MPLW515 mutational status in 35 JAK2V617F negative MPN patients.

| Entity | Number of patients | Cases with a mutational ratio $\geq 1$ |     |
|--------|--------------------|----------------------------------------|-----|
|        |                    | no                                     | %   |
| ET     | 26                 | 7/26                                   | 27% |
| PMF    | 8                  | 6/8                                    | 75% |
| CMML   | 1                  | 0                                      | —   |
| Total  | 35                 | 13/35                                  | 37% |

**Online Supplementary Table S1b.** Distribution of a high level MPLW515 mutational status within different W515 subtypes.

| Mutation subtype | Number of patients | Mutational ratio $\geq 1$ |     |
|------------------|--------------------|---------------------------|-----|
|                  |                    | no                        | %   |
| W515K            | 13                 | 9                         | 69% |
| W515L            | 20                 | 3                         | 15% |
| W515A            | 1                  | 0                         | -   |
| W515R            | 1                  | 1                         | -   |
| Total            | 35                 | 13                        | 37% |

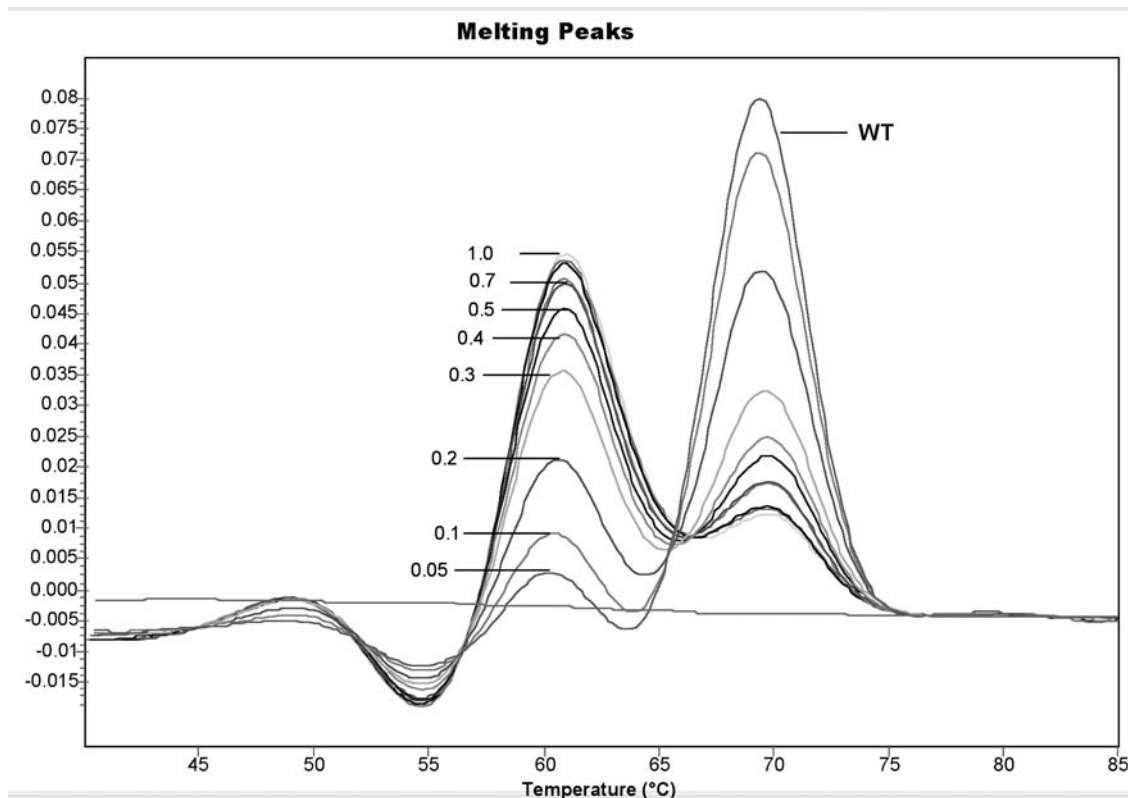

**Online Supplementary Figure S1.** Dilution series of cDNA of a case with homozygous W515K mutation in cDNA of a case with W515wt revealed a sensitivity of this assay of at least 5%. Ratios of mutation in comparison to the wildtype allele are indicated on the left.
